# Supplementary material for: Recruitment of cyanobacteria by reverse transcription quantitative real-time PCR based on expression of Microcystis gene
Source: PeerJ. 2019 Jun 26;7:e7188. doi: 10.7717/peerj.7188 (PMC6599450; doi:10.7717/peerj.7188)
Supplement: Supplemental Information 1 [file peerj-07-7188-s001.xlsx]

## Sheet: Sheet1
	2017.1	2017.2	2017.3	2017.4	2017.5	2017.6
S4gvpC	0.0160859	0.811997	0.0869859	0.0660859	0.0240246	0.00931732
N2gvpC	0.30417	1.0674	2.48283	1.64896	0.497798	0.254688
S4mcyA	0.0112209	0.0322545	0.0149512	0.153854	0.230854	0.0322391
N2mcyA	0.0963459	0.288991	0.373854	0.520541	0.128705	0.0923445
S4espL	0.0116269	0.0449574	0.188991	0.353854	0.0305221	0.0094855
N2espL	0.366372	1.3163	0.686145	0.302125	0.176145	0.0317664
