# Supplementary material for: Recruitment of cyanobacteria by reverse transcription quantitative real-time PCR based on expression of Microcystis gene
Source: PeerJ. 2019 Jun 26;7:e7188. doi: 10.7717/peerj.7188 (PMC6599450; doi:10.7717/peerj.7188)
Supplement: Supplemental Information 4 [file peerj-07-7188-s004.xlsx]

## Sheet: Sheet1
	2017.1	2017.2	2017.3	2017.4	2017.5	2017.6
S4	17.3977	44.9778	264.925	38.3186	50.6736	42.7789
N2	27.3645	31.958	911.929	58.2494	63.7905	34.4509
